# Supplementary material
Source: publisher figshare collection journal article supplement (https://sage.figshare.com/ndownloader/files/14793410)
Supplement: Supplementary file 1 [file 14793410]

**Supplemental Materials**

**Additional Results**

In Study 1, we also conducted simple slopes analyses for partner commitment at levels of social class. The following patterns were observed with objective social class: relatively lower-class participants reported significantly lower life satisfaction when their partners reported low commitment than when their partners reported high commitment, β=0.213, *p*<.001, 95% CI [0.088, 0.339]. Conversely, upper-class participants showed a non-significant tendency to report higher life satisfaction when their partners reported low commitment than when their partners reported high commitment, β=-0.132, *p*=.086, 95% CI [-0.283, 0.019].

With subjective social class, the following patterns were observed: relatively lower-class participants reported significantly lower life satisfaction when their partners reported low commitment than when their partners reported high commitment, β=0.16, *p*=.005, 95% CI [0.048, 0.272]. Upper-class participants, in contrast, did not differ in reports of their life satisfaction when their partners reported low versus high commitment, β=-0.082, *p*=.25, 95% CI [-0.222, 0.058].

We conducted simple slopes analyses for partner commitment at levels of social class in Study 2 as well. The following patterns were observed for state-trait anxiety: Relatively lower-class participants reported significantly higher state-trait anxiety when their partners reported low commitment than when their partners reported high commitment, β=-0.207, *p*=.002, 95% CI [-0.340, -0.075]. In contrast, upper-class participants did not differ in their reported levels of state-trait anxiety when their partners reported low versus high commitment, β=0.024, *p*=.72, 95% CI [-0.108, 0.155].

For dysphoric affect, participants did not differ in their reported levels of dysphoric affect when their partners reported low versus high commitment, regardless of whether they were relatively lower-class, β=-0.074, *p*=.30, 95% CI [-0.213, 0.066], or relatively upper-class, β=0.007, *p*=.92, 95% CI [-0.129, 0.143]

Table 1. Descriptive information for all social class (SES) and commitment measures in Study 1 and 2.

|  | Mean | SD | Minimum | Maximum |
| --- | --- | --- | --- | --- |
| *Study 1* |  |  |  |  |
| Objective SES (Education) | 3.78 | 1.19 | 1 | 6 |
| Subjective SES | 5.57 | 1.64 | 1 | 9 |
|  |  |  |  |  |
| Commitment | 6.13 | 0.91 | 3.14 | 7 |
|  |  |  |  |  |
| *Study 2* |  |  |  |  |
| Objective SES | -0.092 | 0.85 | -1.86 | 1.49 |
| Commitment | 4.26 | 0.62 | 2.17 | 5 |
